# Supplementary material for: Highly responsive phototransistors based on 2,6-bis(4-methoxyphenyl)anthracene single crystal
Source: Royal Society of Chemistry journal article supplement (doi:10.1039/c7tc01563a), 2017-01-01
Supplement: c7tc01563a1.pdf [file c7tc01563a1.pdf]

## Highly Responsive Phototransistors based on the 2,6-bis(4-methoxyphenyl)anthracene Single Crystal

Aiyuan Li<sup>a</sup>, Lijia Yan<sup>b</sup>, Ming Liu<sup>a</sup>, Imran Murtaza<sup>b</sup>, Chao He<sup>a</sup>, Dongwei Zhang<sup>a</sup>,  
Yaowu He<sup>a</sup>, Hong Meng<sup>a\*</sup>

<sup>a</sup> School of Advanced Materials, Peking University Shenzhen Graduate School,  
Shenzhen, 518055, China

<sup>b</sup> Key Laboratory of Flexible Electronics (KLOFE) & Institute of Advanced Materials  
(IAM), Jiangsu National Synergetic Innovation Center for Advanced Materials  
(SICAM), Nanjing Tech University (Nanjing Tech), 30 South Puzhu Road, Nanjing  
211816, China

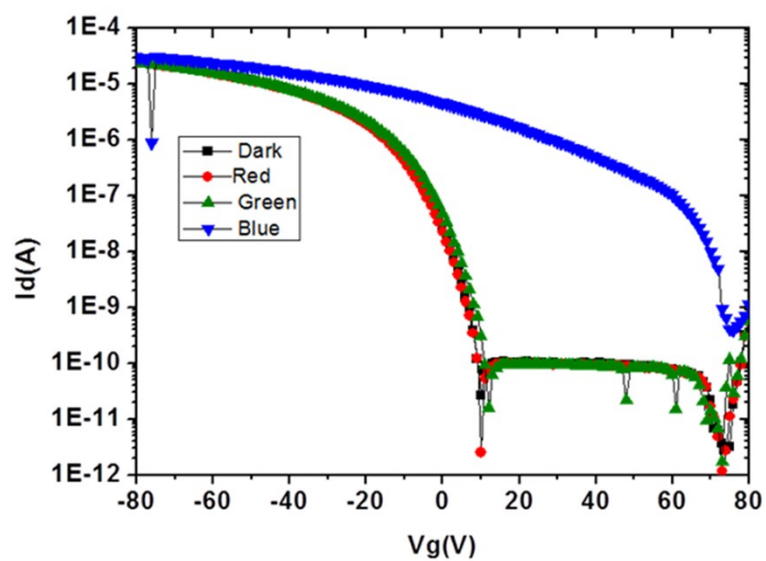

**Supporting Information Figure S1.** Transfer curves of the single crystal based phototransistor under different color LED illumination (central wavelength of Red, Green and Blue lights are 620 nm, 520 nm and 450 nm, respectively).

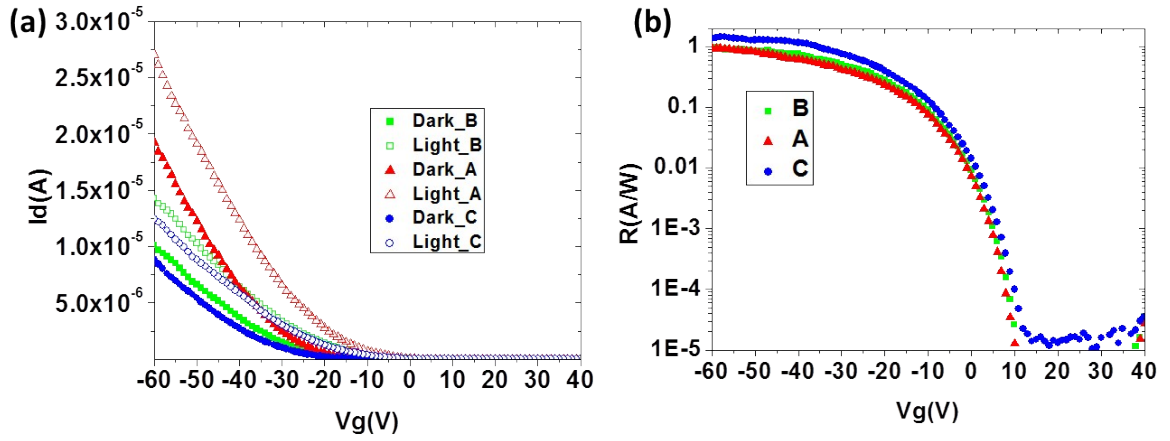

**Supporting Information Figure S2.** Phototransistors performance with different channel widths, (a)  $I_d$ - $V_g$  curves for the three types of phototransistors and (b) photoresponsivity of the three types of phototransistors. (A represent  $L = 98 \mu\text{m}$ ,  $W = 980 \mu\text{m}$ ; B represent  $L = 98 \mu\text{m}$ ,  $W = 490 \mu\text{m}$ ; C represent  $L = 98 \mu\text{m}$ ,  $W = 294 \mu\text{m}$ .)

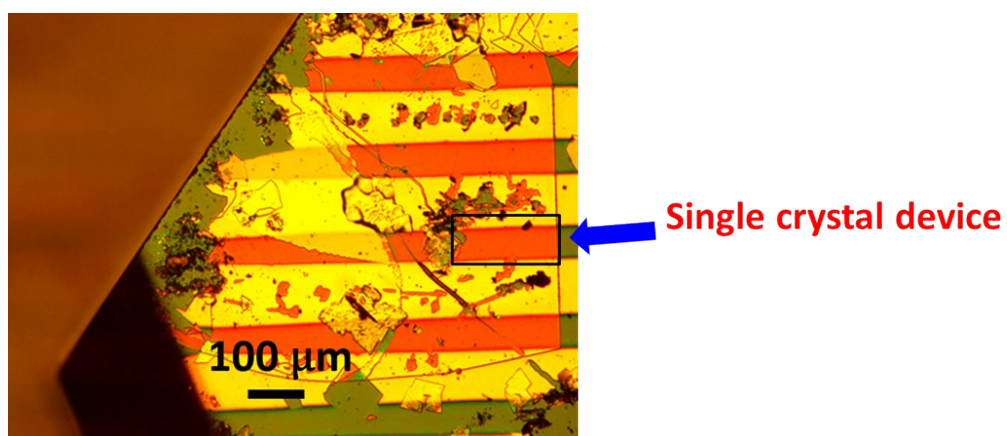

**Supporting Information Figure S3.** BOPAnt single crystal phototransistors device with channel length and channel width of **200 μm** and **65 μm**.
